# Supplementary material
Source: PubMed Central journal article supplement (PMC8050124)

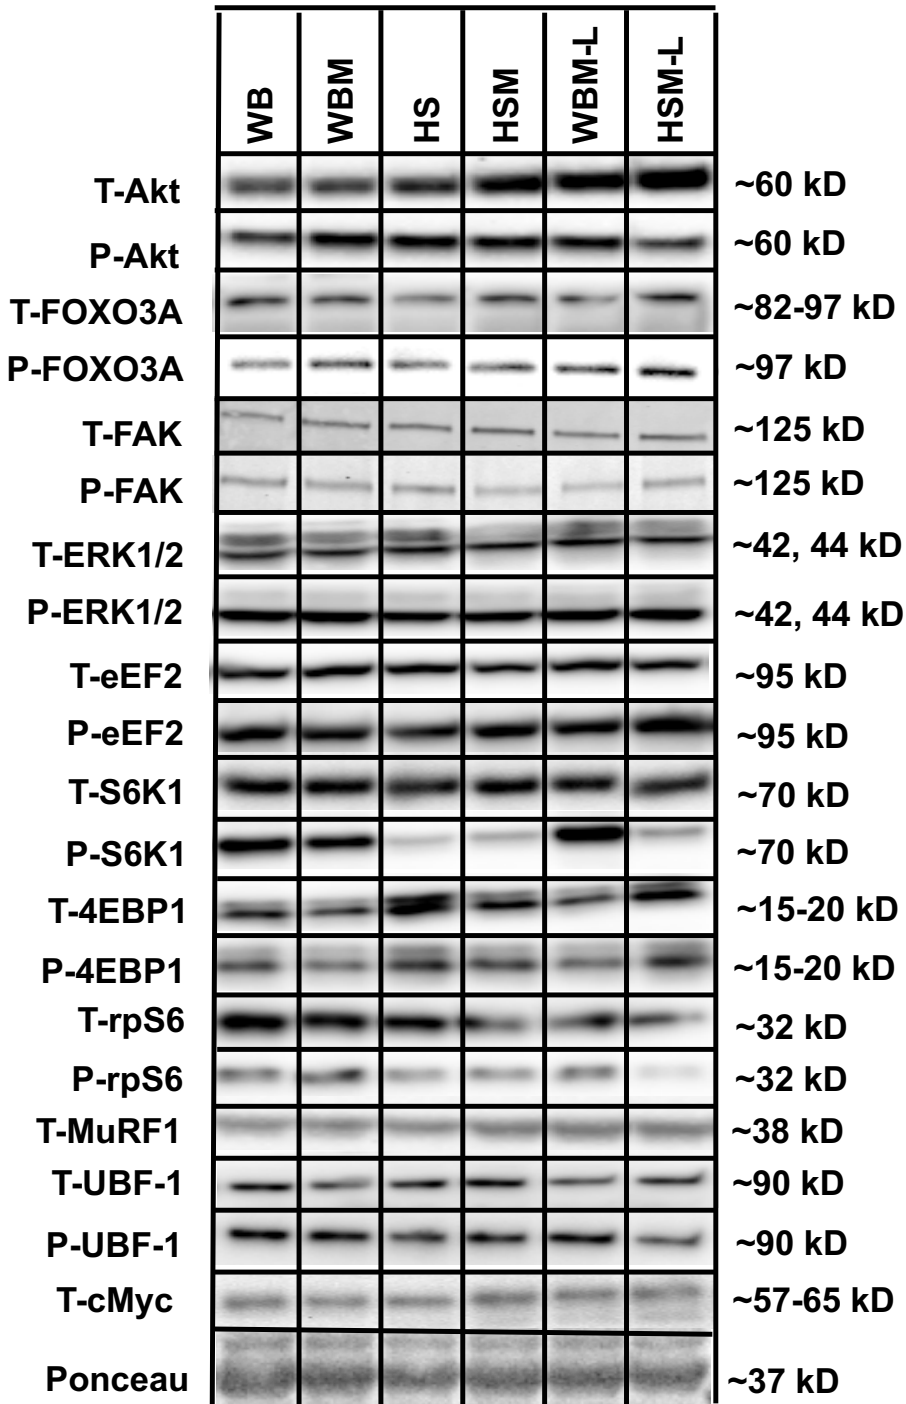

Supplement: 11357_2020_215_MOESM1_ESM.pdf [file 11357_2020_215_MOESM1_ESM.pdf]
